# Supplementary material
Source: PubMed Central journal article supplement (PMC9329163)
Supplement: NIHMS1787465-supplement-1.pdf [file NIHMS1787465-supplement-1.pdf]

**Supplementary Figure 1. Kaplan-Meier Curves Showing Cumulative Ipsilateral PVI Reinterventions for Patients Who Underwent Index Femoropopliteal Atherectomy vs. Non-Atherectomy Peripheral Vascular Intervention Stratified by Index Intervention Type (panel A) and Index Physician Atherectomy Use (panel B)**

Journal Pre-proof

### A. Cumulative Ipsilateral Reinterventions by Index Intervention

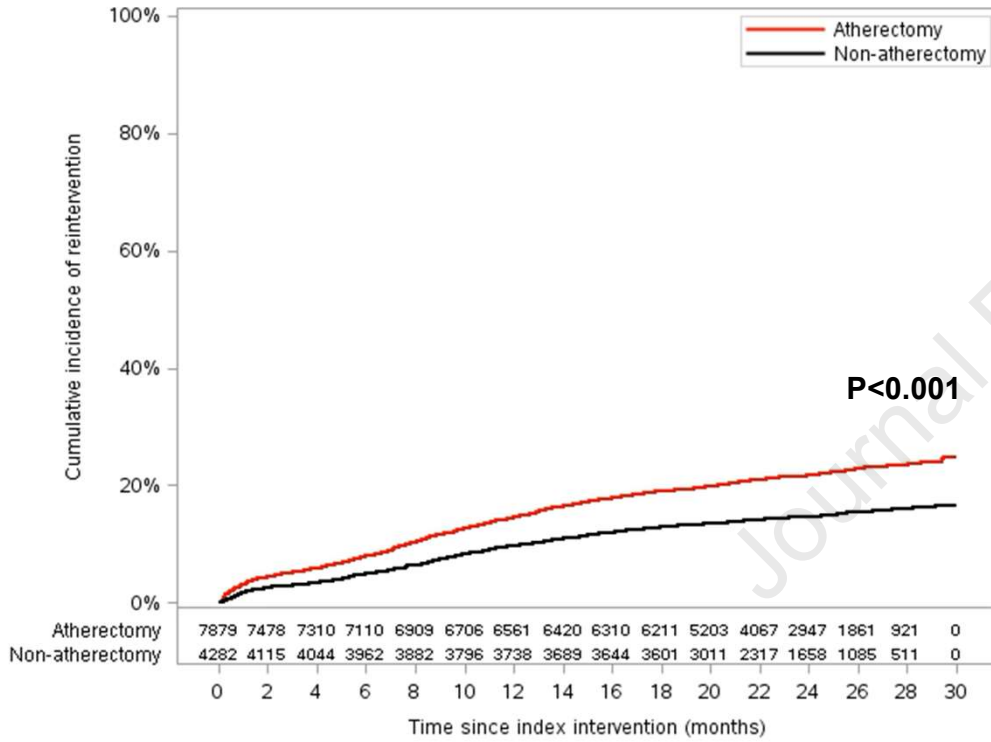

### B. Cumulative Ipsilateral Reinterventions by Index Physician Atherectomy Use

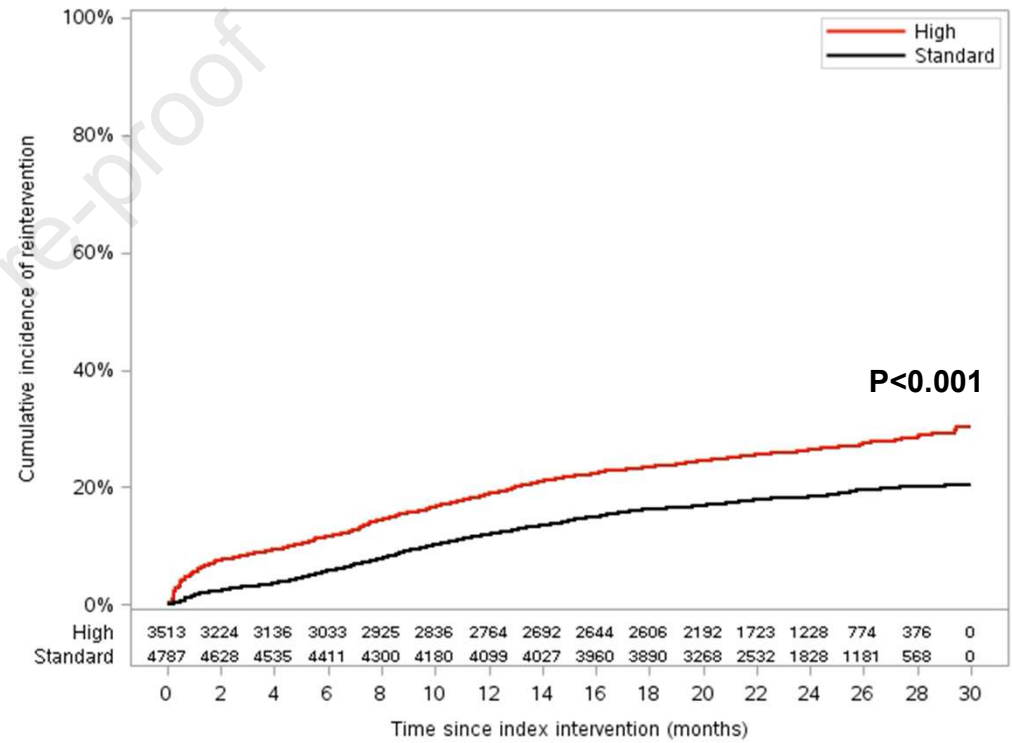

**Supplementary Table 1. Current procedural terminology (CPT) codes used to define index peripheral vascular intervention (PVI) procedures for femoropopliteal disease**

| CPT codes                                       | Description                                                                                                                                                                                                        |
|-------------------------------------------------|--------------------------------------------------------------------------------------------------------------------------------------------------------------------------------------------------------------------|
| <i>Atherectomy</i>                              |                                                                                                                                                                                                                    |
| 37225                                           | Revascularization, endovascular, open or percutaneous, femoral, popliteal artery(s), unilateral; with atherectomy, includes angioplasty within the same vessel, when performed                                     |
| 37227                                           | Revascularization, endovascular, open or percutaneous, femoral, popliteal artery(s), unilateral; with transluminal stent placement(s) and atherectomy, includes angioplasty within the same vessel, when performed |
| <i>Angioplasty/Stenting without Atherectomy</i> |                                                                                                                                                                                                                    |
| 37224                                           | Revascularization, endovascular, open or percutaneous, femoral, popliteal artery(s), unilateral; with transluminal angioplasty                                                                                     |
| 37226                                           | Revascularization, endovascular, open or percutaneous, femoral, popliteal artery(s), unilateral; with transluminal stent placement(s), includes angioplasty within the same vessel, when performed                 |

**Supplementary Table 2. Billing diagnosis codes used for analysis**

| <b>Diagnosis/Procedure</b>        | <b>Code Type</b>    | <b>Codes</b>                                                                                                                                                                |
|-----------------------------------|---------------------|-----------------------------------------------------------------------------------------------------------------------------------------------------------------------------|
| Claudication                      | ICD-9 <sup>a</sup>  | 440.20, 440.21, 443.9                                                                                                                                                       |
|                                   | ICD-10 <sup>b</sup> | I70.20, I70.21, I73.9                                                                                                                                                       |
| Chronic limb-threatening ischemia | ICD-9 <sup>a</sup>  | 440.22 – 440.24, 440.4, 440.8, 442.3, 444.22, 444.81, 445.02, 682.6 – 682.7, 707.1, 707.9, 785.4, 250.70, 250.80, 729.5, 730.27, 892.1, 998.83, 996.74                      |
|                                   | ICD-10 <sup>b</sup> | I70.22 – I70.26, I70.8, I70.92, I72.4, I74.3, I74.5, I75.021 – I75.022, L03.115 – L03.116, L97, L98.499, I96, E11.52, E11.621, M79.609, M86.9, S91.329A, T81.89XA, T82.868A |
| Acute limb ischemia               | ICD-9 <sup>a</sup>  | 444.22, 444.81, 444.89, 444.9                                                                                                                                               |
|                                   | ICD-10 <sup>b</sup> | I74.3, I74.5, I74.8, I74.9                                                                                                                                                  |
| Ever smoking                      | ICD-9 <sup>a</sup>  | 305.1, V15.82                                                                                                                                                               |
|                                   | ICD-10 <sup>b</sup> | F17.2, Z72.0                                                                                                                                                                |
| ESRD                              | ICD-10              | E11.22, N18.3, N18.4, N18.5, N18.6, N18.9, N19, I12.0, I12.9, Z99.2                                                                                                         |
| Diabetes                          | ICD-10              | E10, E11, E12, E13, E14                                                                                                                                                     |
| Hypertension                      | ICD-10              | I10, I11, I12, I13, I15                                                                                                                                                     |

<sup>a</sup>ICD-9: *International Classification of Diseases, Ninth Revision; used to identify diagnoses prior to September 30, 2015*

<sup>b</sup>ICD-10: *International Classification of Diseases, Tenth Revision; used to identify diagnoses after October 1, 2015*

**Supplementary Table 3. Current procedural terminology (CPT) codes used to define reintervention peripheral vascular interventions**

| CPT codes                                       | Description                                                                                                                                                                                                        |
|-------------------------------------------------|--------------------------------------------------------------------------------------------------------------------------------------------------------------------------------------------------------------------|
| <i>Atherectomy</i>                              |                                                                                                                                                                                                                    |
| 37225                                           | Revascularization, endovascular, open or percutaneous, femoral, popliteal artery(s), unilateral; with atherectomy, includes angioplasty within the same vessel, when performed                                     |
| 37227                                           | Revascularization, endovascular, open or percutaneous, femoral, popliteal artery(s), unilateral; with transluminal stent placement(s) and atherectomy, includes angioplasty within the same vessel, when performed |
| 37229                                           | Atherectomy, tibial, peroneal artery, unilateral, initial vessel                                                                                                                                                   |
| 37231                                           | Stent and atherectomy, tibial/peroneal artery, unilateral, initial vessel                                                                                                                                          |
| 37233                                           | Atherectomy, tibial/peroneal artery, unilateral, each additional vessel                                                                                                                                            |
| 37235                                           | Stent placement(s), tibial/peroneal artery, unilateral, each additional vessel                                                                                                                                     |
| <i>Angioplasty/Stenting without Atherectomy</i> |                                                                                                                                                                                                                    |
| 37224                                           | Revascularization, endovascular, open or percutaneous, femoral, popliteal artery(s), unilateral; with transluminal angioplasty                                                                                     |
| 37226                                           | Revascularization, endovascular, open or percutaneous, femoral, popliteal artery(s), unilateral; with transluminal stent placement(s), includes angioplasty within the same vessel, when performed                 |
| 37228                                           | Angioplasty, tibial, peroneal artery, unilateral, initial vessel                                                                                                                                                   |
| 37230                                           | Stent placement(s), tibial, peroneal artery, unilateral, initial vessel                                                                                                                                            |
| 37232                                           | Angioplasty, tibial, peroneal artery, unilateral, each additional vessel                                                                                                                                           |

37234

Stent and atherectomy, tibial/peroneal artery, unilateral, each additional vessel

Journal Pre-proof

**Supplementary Table 4. Current Procedural Terminology (CPT) codes used to define open surgical procedures**

| CPT codes                   | Description                                                                                                 |
|-----------------------------|-------------------------------------------------------------------------------------------------------------|
| <i>Open surgical bypass</i> |                                                                                                             |
| 35556                       | Bypass graft, with vein; femoral-popliteal                                                                  |
| 35566                       | Bypass graft, with vein; femoral-anterior tibial, posterior tibial, peroneal artery or other distal vessels |
| 35570                       | Bypass graft, with vein; tibial-tibial, peroneal-tibial, or tibial/peroneal trunk-tibial                    |
| 35571                       | Bypass graft, with vein; popliteal-tibial, -peroneal artery or other distal vessels                         |
| 35583                       | In-situ vein bypass; femoral-popliteal                                                                      |
| 35585                       | In-situ vein bypass; femoral-anterior tibial, posterior tibial, or peroneal artery                          |
| 35587                       | In-situ vein bypass; popliteal-tibial, peroneal                                                             |
| 35656                       | Bypass graft, with other than vein; femoral-popliteal                                                       |
| 35666                       | Bypass graft, with other than vein; femoral-anterior tibial, posterior tibial, or peroneal artery           |
| 35671                       | Bypass graft, with other than vein; popliteal-tibial or -peroneal artery                                    |
| <i>Major amputation</i>     |                                                                                                             |
| 27590                       | Amputation, thigh, through femur, any level                                                                 |
| 27592                       | Amputation, thigh, through femur, any level; open, circular (guillotine)                                    |
| 27594                       | Amputation, thigh, through femur, any level; secondary closure or scar revision                             |
| 27880                       | Amputation, leg, through tibia and fibula                                                                   |
| 27882                       | Amputation, leg, through tibia and fibula; open, circular (guillotine)                                      |

|       |                                                                               |
|-------|-------------------------------------------------------------------------------|
| 27884 | Amputation, leg, through tibia and fibula; secondary closure or scar revision |
| 27888 | Amputation, ankle, through malleoli of tibia and fibula                       |

Journal Pre-proof
